# Supplementary material
Source: publisher site journal article supplement (https://www.dovepress.com/article/464704)
Supplement: Supplementary file 1 [file get_supplementary_file.php]

**Supplementary Table 1**. Characteristics of MCTD patients combined with PAH

| Projects | Non-PAH (%) (n=51) | PAH (%) (n=8) | P |
| --- | --- | --- | --- |
| M/F | 5/46 | 0/8 | 0.808 |
| Age | 45.76±1.93 | 47.50±6.82 | 0.756 |
| Smoking | 3 (5.9) | 0 (0) | 1 |
| RP | 37 (72.5) | 7 (87.5) | 0.641 |
| Synovitis | 40 (78.4) | 7 (87.5) | 0.904 |
| Cough | 18 (35.3) | 3 (37.5) | 1 |
| Dyspnea | 27 (52.9) | 7 (87.5) | 0.146 |
| Anemia | 7 (13.7) | 4 (50) | 0.0498* |
| CI | 0 (0) | 2 (25) | 0.016* |
| NI | 21 (41.2) | 1 (12.5) | 0.244 |
| Dysphagia | 9 (17.6) | 2 (25) | 0.993 |
| GER | 32 (62.7) | 1 (12.5) | 0.023* |
| Myositis | 35 (68.6) | 5 (62.5) | 1 |
| Infections | 13 (25.5) | 4 (50) | 0.316 |
| IgG (g/L) | 1956.55±756.59 | 2159.88±1408.71 | 0.701 |
| CRP (mg/L) | 1.28±0.33 | 47.4±44.80 | 0.002** |
| RF (%) | 22 (45.8%) | 2 (33.3%) | 0.885 |
| ESR (mm/h) | 32.5±3.97 | 62±11.36 | 0.039* |
| CA724 (U/mL) | 1.5±0.86 | 10.52±3.87 | 0.01** |
| CYFRA211(U/mL) | 3.44±1.84 | 2.29±1.89 | 0.166 |
| CEA (U/mL) | 2.36±1.93 | 2.06±1.68 | 0.69 |
| CA199(U/mL) | 11.32±2.10 | 19.25±5.64 | 0.859 |
| CA153(U/mL) | 15.1±1.77 | 15.66±3.60 | 0.685 |

RP, Raynaud’s phenomenon; CI, Cardiac involvement; NI, Neurological impairment; GER, Gastroesophageal reflux; Ig, Immunoglobulin; CRP, C-reactive protein; RF, Rheumatoid factor; ESR, Erythrocyte sedimentation rate; CA, Carbohydrate antigen; CEA, Carcinoembryonic antigen; CYFRA211, Cytokeratin 19 fragment. * p＜0.05; ** p<0.01

**Supplementary Table 2.** Changes in MCTD patients with ILD at baseline and follow-up

| Patient, gender, age | Baseline | | | | | Follow-up | | | | | |
| --- | --- | --- | --- | --- | --- | --- | --- | --- | --- | --- | --- |
| FVC | FEV1 | FEV1/FVC | DLCO | HRCT | FVC | FEV1 | FEV1/FVC | DLCO | HRCT | Time (months) |
| P1, F, 41 | 105.7 | 94.9 | 92.5 | 70.4 | GGO, Reticulation, Patchy shadow | 101.3 | 88.1 | 89.6 | 75.8 | Reticulation, Patchy shadow | 12 |
| P2, F, 37 | 54.7 | 52.9 | 99.4 | 30.6 | GGO, Reticulation, TB | 47.9 | 45.8 | 98.4 | 37.3 | IST, Patchy shadow | 13 |
| P3, F, 66 | 116 | 112 | 102 | 56 | IST，Reticulation，TB | 78.7 | 89.4 | 108.4 | 53.4 | IST, Reticulation，TB | 25 |
| P4, F, 77 | 91.7 | 91.5 | 93 | 46 | IST，Reticulation, Patchy shadow, TB | 115.7 | 109.7 | 88 | 46.7 | IST, Reticulation, Honeycombing, TB | 12 |
| P5, F, 51 | 76.3 | 69.7 | 92.8 | 52 | IST, GGO | 71 | 65.2 | 93.1 | 65.6 | IST, GGO, Reticulation, TB | 13 |
| P6, F, 50 | 114.8 | 109.8 | 95.8 | 75.5 | Reticulation, IST | 119.1 | 113.7 | 95.5 | 71.3 | Reticulation, IST | 12 |
| P7, F, 69 | 71.1 | 71.1 | 98.3 | 50.5 | TB，Reticulation, Honeycombing, Airspace consolidation | 62.8 | 62.7 | 98 | 37.5 | TB, Reticulation, Honeycombing, Airspace consolidation | 12 |
| P8, M, 67 | 84.9 | 90.4 | 98.8 | 35.7 | TB，Reticulation, Airspace consolidation, GGO | 85.7 | 80 | 86.4 | 33.5 | TB, Reticulation, Airspace consolidation, GGO | 20 |

GGO, ground glass opacity; IST, interlobular septal thickening; TB, traction bronchiectasis.
